# Supplementary material
Source: publisher figshare collection journal article supplement (https://sage.figshare.com/ndownloader/files/17905193)
Supplement: Supplementary file 1 [file 17905193]

**Table S1: Social Support Evaluation Tools used by Respondents**

| Tools Used to Conduct Psychosocial Evaluations                          | Respondents (%) |
|-------------------------------------------------------------------------|-----------------|
| Stanford Integrated Psychosocial Assessment for Transplantation (SIPAT) | 48 (17.39)      |
| Other                                                                   | 21(7.61)        |
| Psychosocial Assessment of Candidates for Transplantation (PACT)        | 8 (2.9)         |
| Transplantation Evaluation Rating Scale (TERS)                          | 3(0.72)         |
| Psychosocial Levels System (PLS)                                        | 2(0.72)         |
| Nottingham Health Profile                                               | 2(0.72)         |
| Social Support Index                                                    | 2 (0.72)        |
| Psychosocial Adjustment to Illness Questionnaire                        | 2 (0.72)        |
| Perceived Social Support Scale                                          | 1(0.36)         |
| Social Support Questionnaire                                            | 1 (0.36)        |
| Social Support Appraisals Scale (SSA)                                   | 1 (0.36)        |

Note. Reported percentages are the number of respondents indicating that they use the indicated tool divided by the total number of respondents. Total may exceed 100% due to respondents reporting the use of more than one tool.

**Appendix-Table S2: Social Support Related Deferrals by UNOS Region**

| UNOS Region | N  | Mean Deferral Rate (%) |
|-------------|----|------------------------|
| Region 1    | 22 | 7.86                   |
| Region 2    | 19 | 9.16                   |
| Region 3    | 11 | 11.36                  |
| Region 4    | 23 | 9.35                   |
| Region 5    | 29 | 8.38                   |
| Region 6    | 10 | 5.60                   |
| Region 7    | 18 | 9.56                   |
| Region 8    | 10 | 15.80                  |
| Region 9    | 15 | 7.53                   |
| Region 10   | 23 | 10.17                  |
| Region 11   | 33 | 12.67                  |

**Appendix- Table S3: Whether patients are informed of a social support related deferral as a function of respondent gender, perceptions of evaluation procedures, and confidence in using the social support criterion**

|                                                                                        | Respondent Gender<br>(Model 1) |             | Perceptions of<br>Evaluation Procedures<br>(Model 2) |              | Confidence in Using Social<br>Support Criterion<br>(Model 3) |              |
|----------------------------------------------------------------------------------------|--------------------------------|-------------|------------------------------------------------------|--------------|--------------------------------------------------------------|--------------|
| Variable                                                                               | OR                             | [CI]        | OR                                                   | [CI]         | OR                                                           | [CI]         |
| Male                                                                                   | 0.34**                         | [0.16,0.74] | 0.34**                                               | [0.16, 0.73] | 0.37*                                                        | [0.17, 0.80] |
| Perception that respondent's center<br>uses clear and consistent guidelines            |                                |             | 1.44†                                                | [0.99,2.08]  | 1.12                                                         | [0.71, 1.78] |
| Confidence in using social support<br>criterion to determine transplant<br>eligibility |                                |             |                                                      |              | 1.82†                                                        | [0.97,3.40]  |

Note.

Results from a sequential logistic regression using perceptions of center procedures and confidence in social support criterion to predict whether patients are always informed that inadequate social support contributed to their negative listing decision. Hosmer and Lemeshow Test  $p > 0.83$ . † $p < 0.06$  \* $p < 0.05$  \*\* $p < 0.01$
